# Supplementary material for: An apical membrane complex for triggering rhoptry exocytosis and invasion in Toxoplasma
Source: PubMed Central journal article supplement (PMC9670195; doi:10.15252/embj.2022111158), 2022-10-17

**Related to figure 2**

**Figure 2A, left panels**

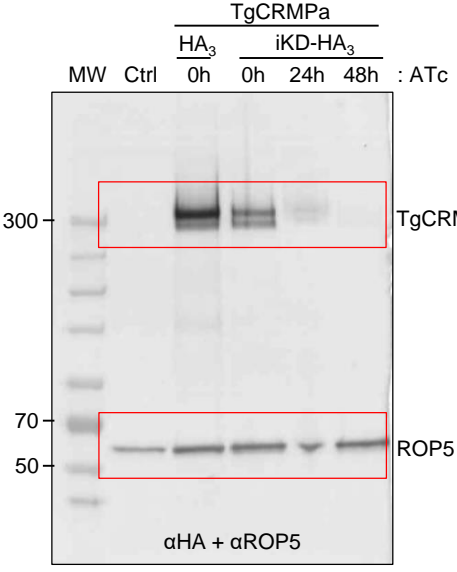

**Figure 2A, right panels**

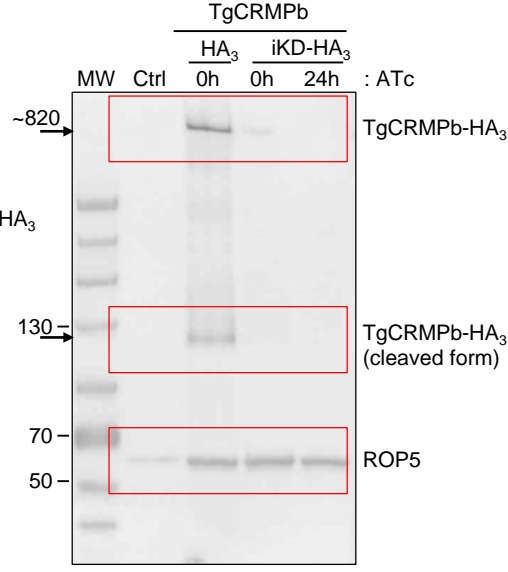

**Figure 2H, left panels**

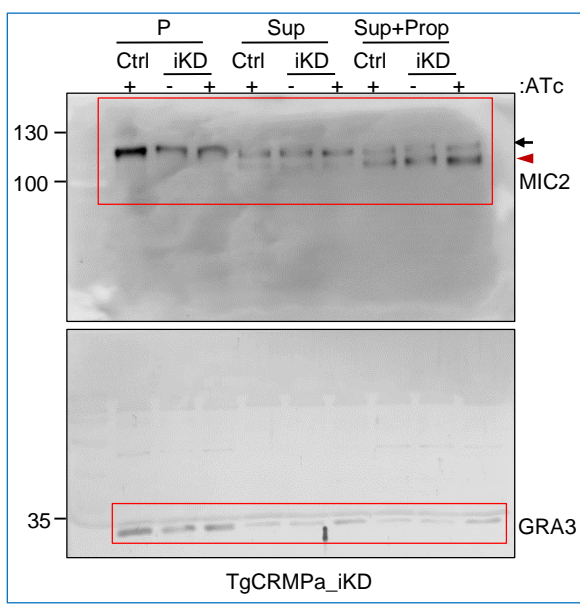

**Figure 2H, right panels**

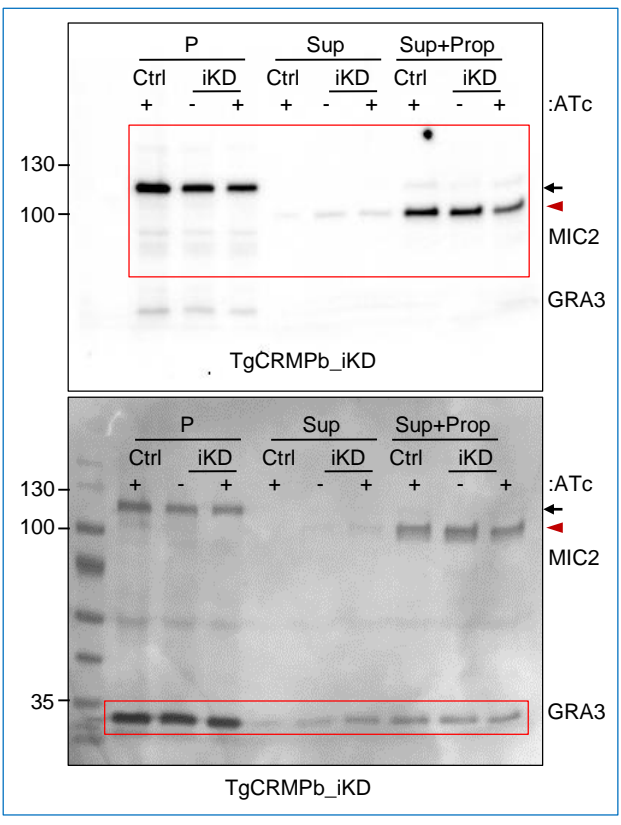

Supplement: EMBJ-41-e111158-s002.pdf [file EMBJ-41-e111158-s002.pdf]
