# Supplementary material for: An apical membrane complex for triggering rhoptry exocytosis and invasion in Toxoplasma
Source: PubMed Central journal article supplement (PMC9670195; doi:10.15252/embj.2022111158), 2022-10-17

Related to figure 5

Figure 5G

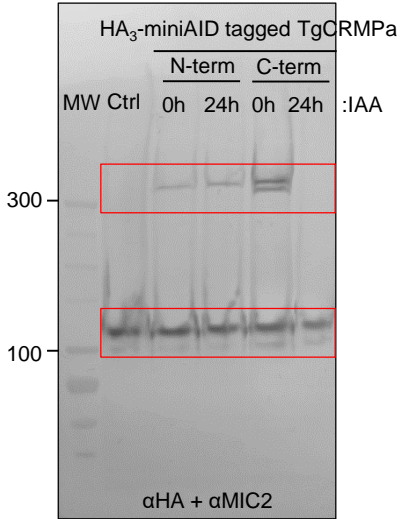

Figure 5I

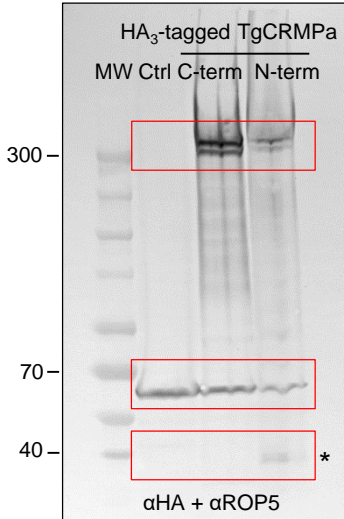

Supplement: EMBJ-41-e111158-s004.pdf [file EMBJ-41-e111158-s004.pdf]
