# Supplementary material for: An apical membrane complex for triggering rhoptry exocytosis and invasion in Toxoplasma
Source: PubMed Central journal article supplement (PMC9670195; doi:10.15252/embj.2022111158), 2022-10-17
Supplement: EMBJ-41-e111158-s011.pdf [file EMBJ-41-e111158-s011.pdf]

## Expanded View Figures

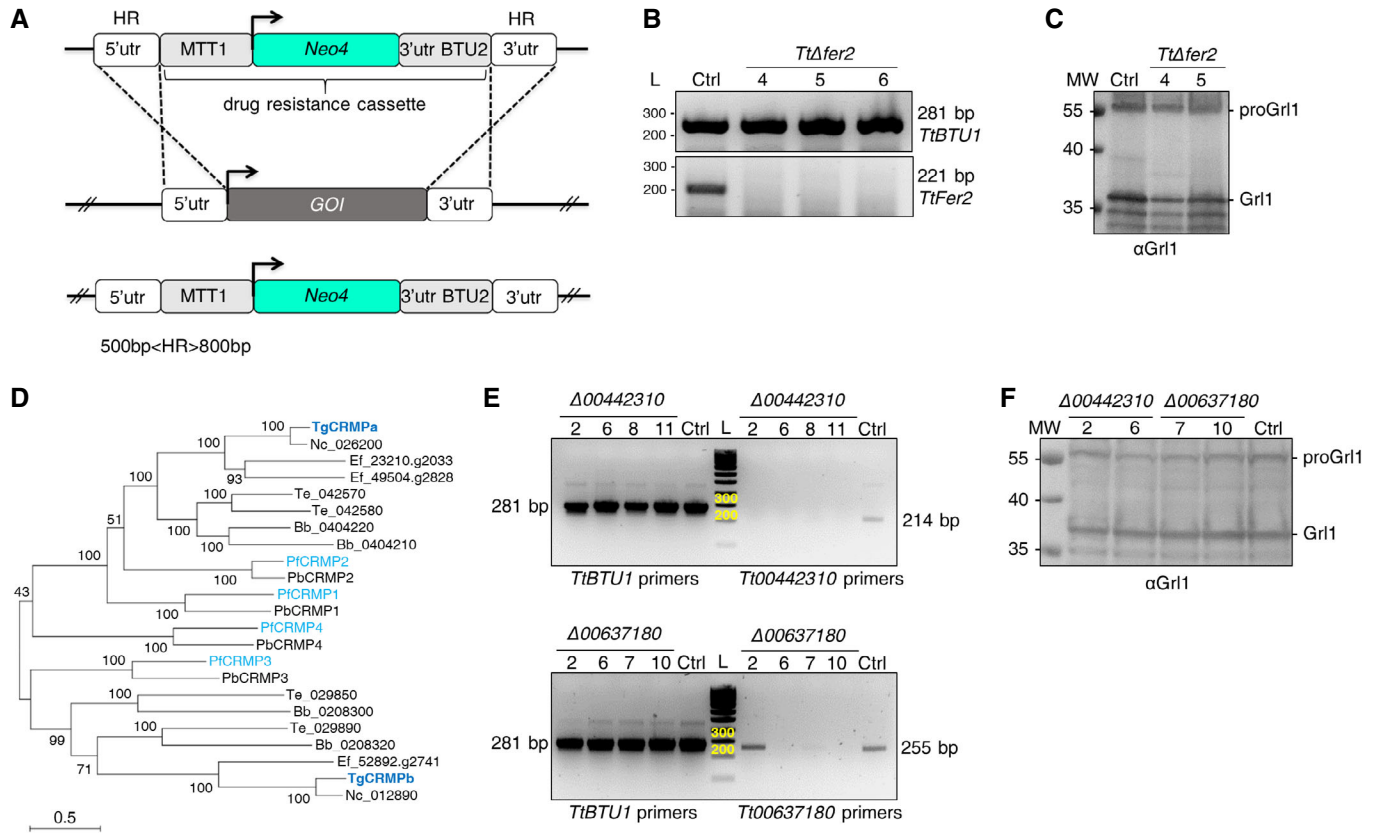

**Figure EV1. *Tetrahymena* TtFer2, Tt00442310, and Tt00637180 are essential for mucocyst secretion (related to Fig 1).**

- A** Strategy for the macronuclear knockout of *Tetrahymena thermophila* genes of interest (GOI). A linearized construct carrying fragments (HR) homologous to the 5' and 3'-untranslated regions (UTR) of the GOI and flanking the drug resistance cassette were used to replace the GOI at the endogenous locus. The CdCl<sub>2</sub>-inducible MTT1 promoter drives the expression of a paromomycin resistance gene (Neo4) used for selecting positive transformants.
- B** Disruption of the macronuclear copies of *TtFer2* (ferlin 2; TTHERM\_00886960) was assessed by RT-PCR. cDNA from wild-type (Ctrl) and three clones of putative knockout cells (*Afer2*) were PCR amplified with primers specific for *TtBTU1* ( $\beta$ -tubulin 1; upper panel) and *TtFer2* (lower panel). The 221 bp products corresponding to transcripts from *Fer2* are absent in the *Afer2* clones, indicating that all the wild-type copies of *TtFer2* were efficiently replaced with the Neo4 cassette. All samples showed wild-type levels of *BTU1* transcripts. L: DNA ladder (bp). Primers are listed in Table EV1.
- C** Western blot of whole-cell lysates from wild-type (Ctrl) and *Afer2* cells. In both, wild-type and mutant extracts, anti-Grl1 antibodies recognized the ~ 60 kDa precursor of the granule protein 1, proGrl1, and the processed form of Grl1, between 35 and 40 kDa, indicating non-significant defects in proteolytic maturation. MW: molecular weight standards.
- D** Phylogeny depicting the relationships between Apicomplexa CRMPs. The maximum-likelihood phylogenetic tree was obtained with the protein sequences of CRMP genes retrieved for the apicomplexans *Toxoplasma gondii* (TgCRMP), *Plasmodium falciparum* (PfCRMP), *Plasmodium berghei* (PbCRMP), *Neospora caninum* (Nc), *Eimeria falciformis* (Ef), *Theileria equi* (Te), and *Babesia bigemina* (Bb). *Toxoplasma* and *P. falciparum* CRMPs are highlighted in bold blue and light blue, respectively. Numbers at each node correspond to the bootstrap values. The scale bar represents the branch length.
- E** Disruption of the macronuclear copies of TTHERM\_00442310 and TTHERM\_00637180 was assessed by RT-PCR as in (B). Four clones for each putative knockout cell were tested. The 214 and 255 bp fragments corresponding to transcripts for TTHERM\_00442310 and TTHERM\_00637180, respectively, are absent in all *Tt00442310* clones, and nearly undetectable in clones 6, 7, and 10 for *Tt00637180*, indicating the achievement of full knockout. Clones 2 and 6 for *Tt00442310* and clones 7 and 10 for *Tt00637180* were selected for further analysis. All samples show wild-type levels of *BTU1* transcripts. L: DNA ladder (bp). Primers are listed in Table EV1.
- F** Western blot of whole-cell lysates from wild-type (Ctrl), *Tt00442310*, and *Tt00637180* cells. In both wild-type and mutant extracts, anti-Grl1 antibodies recognized processed Grl1 between 35 and 40 kDa and the precursor proGrl1 at ~ 60 kDa, indicating non-significant defects in proteolytic maturation. MW: molecular weight standards.

Source data are available online for this figure.

**Figure EV2. TgCRMPa- and TgCRMPb-depleted tachyzoites have normal rhoptries, and show no defects in replication, stimulated egress, and attachment (related to Fig 2).**

- A Strategy for tagging genes of interest (GOI) in *Toxoplasma*. To generate C-terminal HA<sub>3</sub>-fusions of TgCRMPa and TgCRMPb, a DNA fragment was amplified from a donor vector containing the HA<sub>3</sub> tag and the drug resistance cassette (CAT). Primers to amplify the DNA fragment were designed to contain ~30-bp-long stretches (HR) homologous to the GOI regions flanking the insertion site for the epitope tag. Upon CRISPR-cas9 cut (scissors), the PCR-amplified DNA fragment efficiently recombines into the targeted endogenous locus. The arrows indicate the binding sites of the primers used in (B).
- B Integration of the HA<sub>3</sub> tag and CAT cassette at the C-terminus of TgCRMPa (upper panel) and TgCRMPb (lower panel) was tested by PCR. Genomic DNA from the untagged line and a clonal population for each of the putative HA<sub>3</sub>-tagged lines was amplified with primers binding to the 3' C-terminus and 3' UTR of each TgCRMP gene, in pairwise combination with primers binding the HA<sub>3</sub> and CAT sequences, respectively. The fragments corresponding to the HA<sub>3</sub> tag (5') and the resistance cassette (3') were correctly amplified in the putative tagged lines, indicating that they were efficiently integrated at the TgCRMPs loci. As expected, the wild-type fragment of each gene (wt) was detected only in the untagged line. L: DNA ladder (bp). Primers are listed in Table EV1.
- C Strategies for the inducible depletion (iKD) of genes of interest (GOI) in *Toxoplasma*. The iKD lines for TgCRMPs were generated starting from the HA<sub>3</sub>-tagged lines previously produced. In order to conditionally deplete the proteins, the endogenous promoter of each gene was replaced with an ATc-regulatable TetOSag4 promoter, preceded by the DHFR resistance cassette. The DNA fragment containing the cassette and the promoter was PCR amplified from a donor vector with primers containing ~30-bp-long homology regions (HR) specific for each gene and introduced upstream the starting codon via CRISPR-cas9 technology (scissors) and homologous recombination. The arrows indicate the binding sites of the primers used in (D) and Fig EV3G.
- D Integration of the TetOSag4 promoter in TgCRMPa-HA<sub>3</sub> (upper panel) and TgCRMPb-HA<sub>3</sub> (lower panel) lines was tested by PCR. Integration of the DHFR resistance cassette was successfully PCR-amplified only for TgCRMPb-HA<sub>3</sub> (lower panel) line. Genomic DNA from untagged parasites and putative TgCRMPa\_iKD and TgCRMPb\_iKD clonal populations was amplified with primers binding to the 5' UTR and 5' N-terminus of the GOI, flanking the DHFR-TetOSag4 insert, and used also in pairwise combination with primers binding the DHFR cassette and the TetOSag4 promoter, respectively. The fragments corresponding to the DHFR integration (5') and TetOSag4 integration (3') were detected exclusively in the putative iKD lines, while the wild-type fragment (wt) was amplified only in the untagged line. L: DNA ladder (bp). Primers are listed in Table EV1.
- E Immunofluorescence images of untagged, TgCRMPa-HA<sub>3</sub>, and TgCRMPb-HA<sub>3</sub> lines and TgCRMPs-depleted (iKD) intracellular tachyzoites. Parasites were stained with anti-HA and anti-ARM (ARO) Abs to visualize TgCRMPs and rhoptries, respectively. The nuclei (DNA) are stained with Hoechst. TgCRMPs pattern mirrors that of Fig 2B. Rhoptries show a wild-type appearance in the TgCRMPs-depleted parasites. Shown are single focal planes.
- F Confocal immunofluorescence images of TgCRMPb-depleted (iKD) intracellular tachyzoites. Parasites were stained with anti-HA and with anti-GAMA and anti-PLP1 Abs to visualize TgCRMPb and micronemes, respectively. The nuclei (DNA) are stained with Hoechst. Shown are single focal planes.
- G Extent of co-localization between TgCRMPb-HA<sub>3</sub> (light red) and microneme proteins AMA1, MIC2, GAMA, and PLP1 shown in (F) and Fig 2D. Untagged parasites were analyzed in parallel to estimate the background noise (light gray), and the extent of overlap between the microneme proteins AMA1 and MIC2 (dark gray). Pearson's correlation coefficient was measured using the Fiji-JaCoP plugin. Values are expressed as mean ± SD; n, number of parasites analyzed.
- H Replication measured for TgCRMPa- and TgCRMPb-depleted parasites. The percentage of vacuoles with 2, 4, 8, 16, and 32 parasites was calculated for control (Ctrl), and TgCRMPa\_iKD and TgCRMPb\_iKD lines, in the absence of ATc and upon 48 and 24 h ATc treatment, respectively. Both iKD mutants (+ATc) are capable of efficient replication. Data are reported as mean ± SD (n = 2 biological replicates, each with three technical replicates).
- I Stimulated egress was quantified for TgCRMPa- and TgCRMPb-depleted parasites. Infected cells with intact vacuoles were treated with A23187 to induce parasite egress, measured as a number of burst vacuoles over the total number of vacuoles. Egress was tested for control (Ctrl), TgCRMPa\_iKD and TgCRMPb\_iKD lines, in the absence of ATc and upon 48 and 24 h ATc treatment, respectively. Values are reported as mean ± SD (n = 3 biological replicates, each with three technical replicates). The biological replicates are represented by different symbols. P-values are non-significant for all datasets (two-tailed t-test).
- J Attachment measured for TgCRMPa- and TgCRMPb-depleted parasites. The number of parasites attached to the host cell was counted for control (Ctrl), TgCRMPa\_iKD and TgCRMPb\_iKD lines, in the absence of ATc and upon 48 and 24 h ATc treatment, respectively. BAPTA treatment was used as a control since it prevents attachment. TgCRMPa- and TgCRMPb-depleted parasites were able to attach to host cells. Values are reported as in (I); n = 3 biological replicates, each with three technical replicates). The biological replicates are represented by different symbols. P-values were measured by a two-tailed t-test.

Source data are available online for this figure.

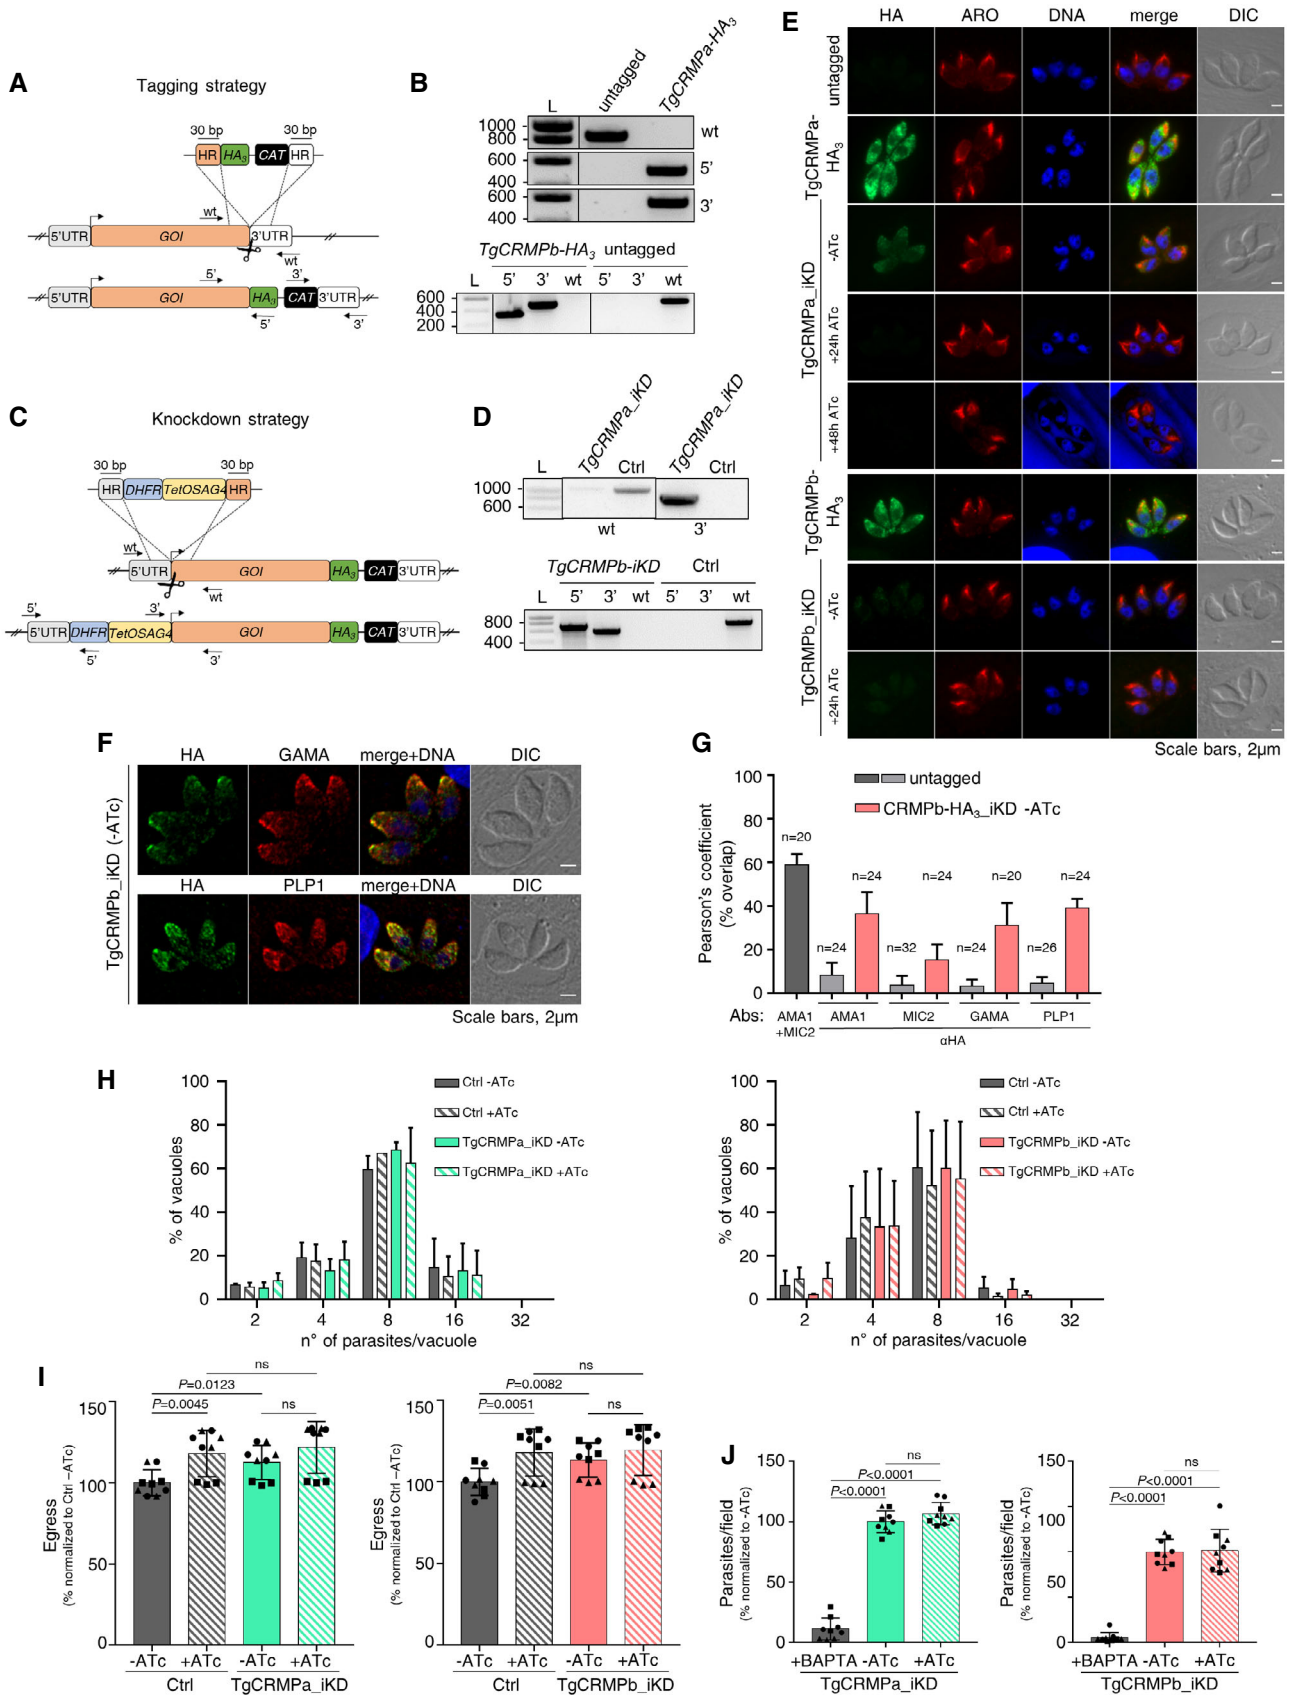

Figure EV2.

**Figure EV3. Tg277910-depleted tachyzoites with a disrupted lytic cycle show no defects in microneme staining, replication, stimulated egress, and attachment (related to Fig 3).**

- A Coomassie Blue staining of eluted proteins (1, 3, 5) immunoprecipitated (IP) with anti-HA beads, and protein fractions of the corresponding clear lysates (CL; 2, 4, 6) prior to beads incubation, from TgCRMPa-HA<sub>3</sub>, TgCRMPb-HA<sub>3</sub>, and untagged lines. The TgCRMP protein used as bait in each IP lane is indicated by the asterisk. Samples in lanes 1, 3, and 5 were analyzed by mass spectrometry. MW: molecular weight standards.
- B Marker-free strategy for FLAG<sub>3</sub> tagging of TgCRMPa. To generate a C-terminal FLAG<sub>3</sub> fusion of TgCRMPa, a gBlock containing the FLAG<sub>3</sub> tag flanked by ~ 30-bp-long TgCRMPa homology regions (HR) was amplified and integrated into the TgCRMPa endogenous locus via CRISPR-cas9 technology (scissors). The FLAG<sub>3</sub>-tagged TgCRMPa was generated also in the TgCRMPb-HA<sub>3</sub> line. The arrows indicate the binding sites of the primers used in (C).
- C Integration of the FLAG<sub>3</sub> tag was tested by PCR in putative TgCRMPa-FLAG<sub>3</sub> and TgCRMPa-FLAG<sub>3</sub> + TgCRMPb-HA<sub>3</sub> lines. The addition of the tag at the C-terminus of the TgCRMPa gene corresponds to the insertion of an additional 74 bp to the wild-type sequence. A higher band was observed in the putative tagged lines compared to the untagged ones. DNA ladder (L) is shown on the left of each panel. Primers are listed in Table EV1.
- D Eluates from Fig 3B and 1/20 of the clear lysates (before beads incubation) were also immunoblotted with anti-ROP5 antibodies to confirm the specificity of the immunoprecipitation experiments. The red arrowhead indicates TgROP5 protein, and the asterisk indicates unspecific bands detected in the eluates, likely corresponding to the light chain of the beads-conjugated antibody. MW: molecular weight standards.
- E Strategy based on the pLIC system (Huynh & Carruthers, 2009) for tagging Tg277910 with triple HA. The arrows indicate the binding sites of the primers used in (F).
- F Integration of the HA<sub>3</sub> tag and CAT cassette at the C-terminus of TGGT1\_277910 was tested by PCR. Genomic DNA from an untagged line and a clonal population for the putative HA<sub>3</sub>-tagged line were amplified with primers binding to the 3' C-terminus of TGGT1\_277910 and HA<sub>3</sub> sequence. The HA<sub>3</sub> tag (5') was correctly amplified indicating that it was efficiently integrated at the TGGT1\_277910 locus. L: DNA ladder (bp). Primers are listed in Table EV1.
- G Integration of the DHFR cassette followed by the TetOSag4 promoter in TGGT1\_277910 line was tested by PCR as in Fig EV2C and D. Genomic DNA from untagged parasites and putative Tg277910\_iKD clonal population was amplified with primers binding the gene's 5' UTR and 5' N-terminus, flanking the DHFR-TetOSag4 insert, and used also in pairwise combination with primers binding the DHFR cassette and the Sag4 promoter, respectively. The wild-type fragment (wt) was amplified only in the control line (Ctrl), while the fragments corresponding to the DHFR integration (5') and TetOSag4 integration (3') were detected exclusively in the putative iKD line. A low-abundant unspecific band of similar size to the 3' fragments was observed in the untagged line. L: DNA ladder (bp). Primers are listed in Table EV1.
- H Whole-cell lysates were collected from Tg277910-HA<sub>3</sub> parasites (HA<sub>3</sub>) and from the line generated for the inducible knockdown (iKD) treated with ATc for 24, 48, and 72 h and untreated. The samples were immunoblotted with anti-HA Abs (upper panel) to visualize Tg277910 protein under all mentioned conditions. TgROP5 was used as a loading control (lower panel). A band corresponding to the predicted size for Tg277910 (~ 138 kDa) was detected in the untreated samples (-) and decreased overtime in the ATc-treated ones (+) to completely disappear upon 72 h of ATc treatment. Protein molecular weight standards (MW) are shown on the left of each panel.
- I Immunofluorescence images of untagged and Tg277910-HA<sub>3</sub>- and Tg277910-depleted (iKD) intracellular tachyzoites. Parasites were stained with anti-HA and anti-AMA1 Abs to label Tg277910 and micronemes, respectively. The nuclei (DNA) are stained with Hoechst. Tg277910-HA<sub>3</sub> pattern mirrors that of Fig 3D. Micronemes show a wild-type appearance in the Tg277910-depleted parasites. Shown are single focal planes.
- J Quantification of plaques for Tg277910-depleted parasites. Lysis plaque areas were measured for untreated and 72 h ATc-treated control and iKD lines. Values are reported as mean ± SD (*n* = 3 biological replicates, each with three technical replicates). The biological replicates are represented by different symbols.
- K–M Quantification of replication (K), stimulated egress (L), and attachment (M) for control (Ctrl) and Tg277910-depleted (iKD) lines were performed as in Fig EV2H–J, respectively, with 72 h ATc-treated and untreated parasites. Tg277910-depleted parasites replicate, egress, and attach normally. Values are reported as in (J); replication and egress: *n* = 2 biological replicates, each with three technical replicates; attachment: *n* = 3 biological replicates, each with three technical replicates). The biological replicates are represented by different symbols.

Data information: *P*-values in (J and M) were measured by a two-tailed *t*-test.

Source data are available online for this figure.

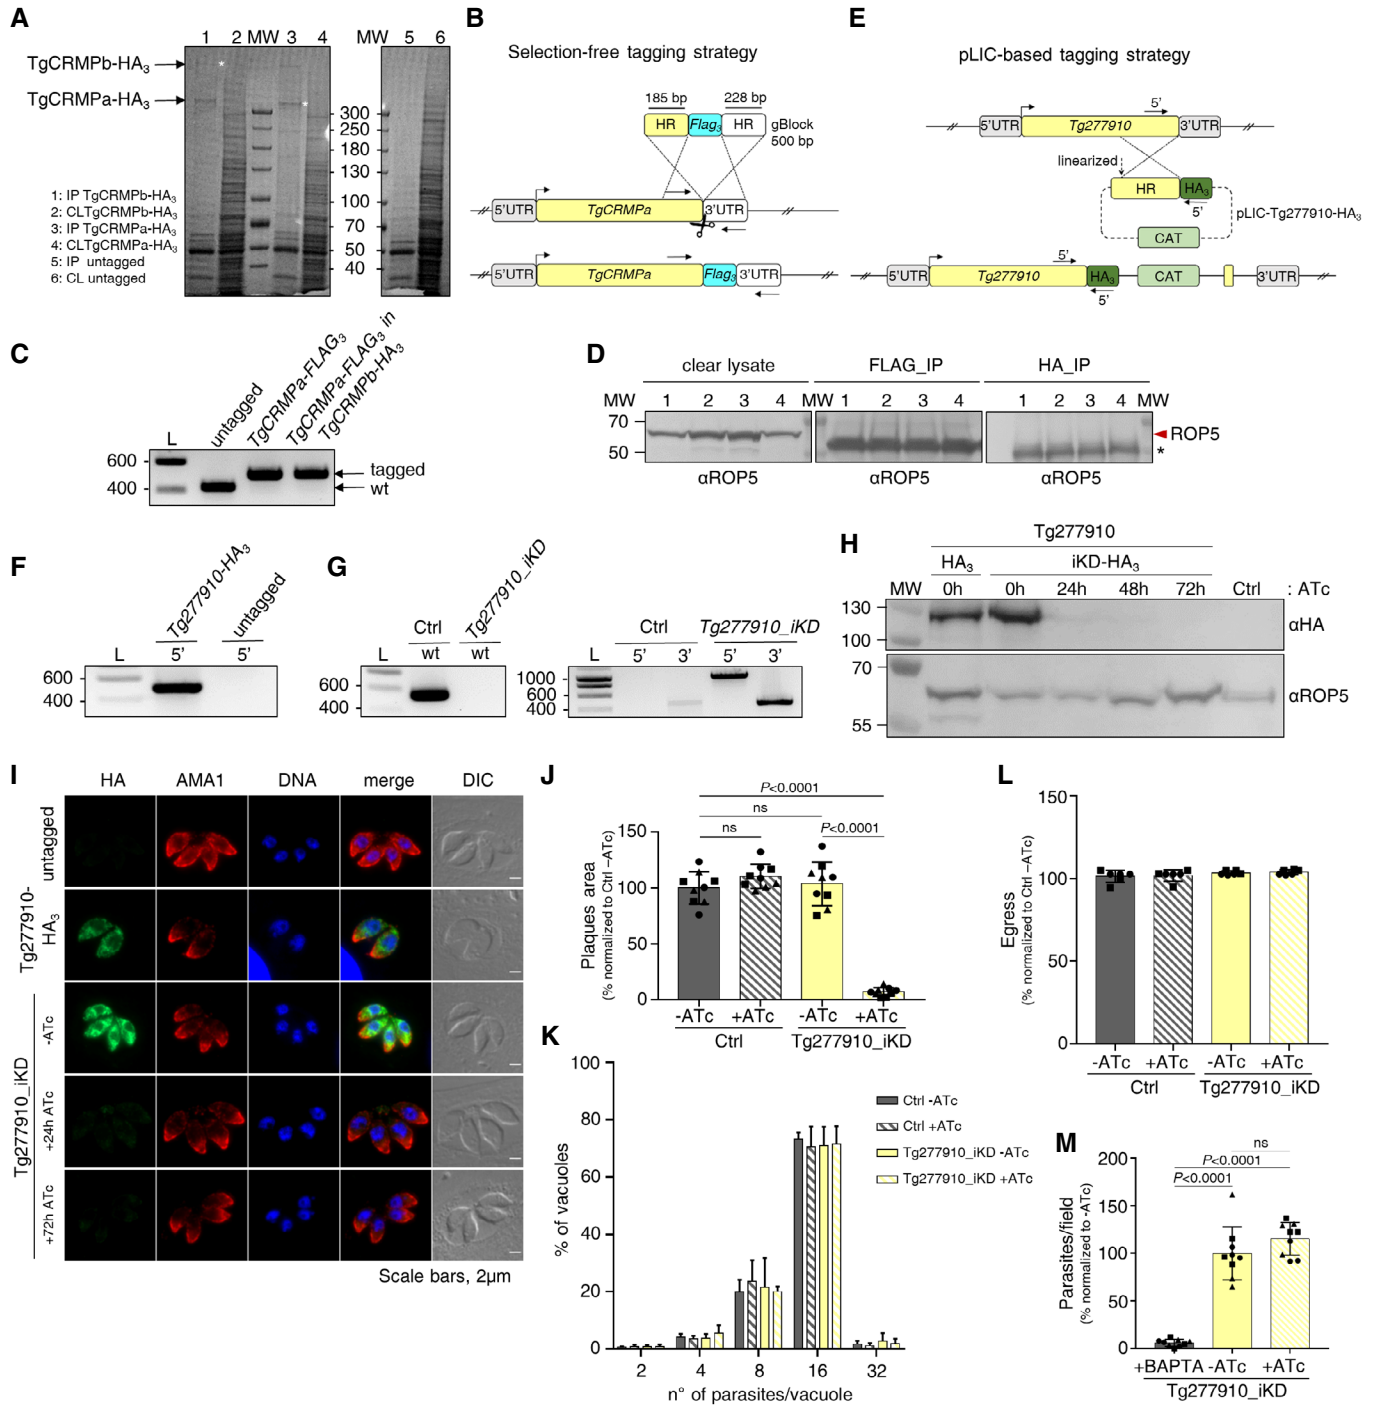

Figure EV3.

**Figure EV4. TgCRMPa and TgCRMPb accumulate at the tip of the extruded conoid (related to Fig 5).**

- A Quantification of the dot pattern for TgCRMPa-HA<sub>3</sub> in TgCRMPa-depleted (iKD) tachyzoites. TgCRMPa accumulation at the apical tip of extracellular parasites was measured upon incubation with host cell monolayers for 2 min to stimulate natural conoid extrusion. CRMPa signal at the apical dot disappeared after 48 h ATc treatment, indicating that the association with the tip of the extruded conoid was specific. No significant apical signal was detected for the control line (Ctrl), as in Fig 5B. Numbers are expressed as a percentage of parasites showing (dot) or lacking (no dot) the tip accumulation of TgCRMPa. The number of parasites (*n*) analyzed for each line is reported on the column tops.
- B Strategy for the inducible depletion (iKD) of TgCRMPa-FLAG<sub>3</sub>. The iKD lines were generated starting from the FLAG<sub>3</sub>-tagged lines previously produced. In order to conditionally deplete the protein, the endogenous promoter of the TgCRMPa-FLAG<sub>3</sub> gene was replaced with an ATc-regulable TetOSag4 promoter, preceded by the DHFR resistance cassette. The DNA fragment containing the cassette and promoter was PCR-amplified from a donor vector with primers containing ~ 30-bp-long homology regions (HR) specific for *TgCRMPa* gene, and introduced upstream to the starting codon via CRISPR-cas9 technology (scissors) and homologous recombination. The arrows indicate the binding sites of the primers used in (C).
- C Integration of the DHFR cassette followed by the TetOSag4 promoter in the putative TgCRMPa-FLAG<sub>3</sub> and TgCRMPa-FLAG<sub>3</sub> + TgCRMPb-FLAG<sub>3</sub> iKD lines was tested by PCR as in Fig EV2C and D (upper panel). The fragments corresponding to the DHFR integration (5') and TetOSag4 integration (3') were detected exclusively in the putative iKD lines, while the wild-type fragment (wt) was amplified only in the control line (Ctrl). L: DNA ladder (bp). Primers are listed in Table EV1.
- D Whole-cell lysates from untagged and TgCRMPa-FLAG<sub>3</sub>-iKD and TgCRMPa-FLAG<sub>3</sub>-iKD + TgCRMPb-HA<sub>3</sub> lines were immunoblotted with anti-FLAG Abs to visualize tagged CRMPa in ATc-treated and untreated samples. CRMPa disappeared upon 48 h ATc incubation in both lines. A ~ 300 kDa unspecific cross-reactive band was observed in all samples. MW: molecular weight standards.
- E Auxin-degron strategy used for generating TgCRMPa-miniAID-HA<sub>3</sub> strain. The integration of the tag and drug resistance cassette into the *TgCRMPa* locus is ensured by ~ 30-bp-long homology regions (HR) upon CRISPR-Cas9 activity (scissors). The arrows indicate the binding sites of the primers used in (F).
- F Integration of the miniAID-HA<sub>3</sub> and HXGPRT cassette at the *TgCRMPa* locus in the Tir-1 line was tested by PCR as in Fig EV2A and B (upper panel). The fragments corresponding to the miniAID-HA<sub>3</sub> (5') and HXGPRT cassette (3') integration were detected exclusively in the putative iKD line, while the wild-type fragment (wt) was amplified only in the untagged line. A ~ 4,000 bp fragment corresponding to the miniAID-HA<sub>3</sub> + HXGPRT cassette, and amplified with primers binding the wild-type sequence, was detected in the iKD line. L: DNA ladder (bp). Primers are listed in Table EV1.
- G Marker-free strategy used for generating HA<sub>3</sub>-miniAID-TgCRMPa strain. The integration of the tag at the N-terminus between residues Val69 and Leu70 (before the MAR/Kringle domain; Fig 5E) into the *TgCRMPa* locus is ensured by 207- and 265-bp-long homology regions (HR) flanking the tag in the synthetic gBlock, upon CRISPR-Cas9 activity (scissors). The arrows indicate the binding sites of the primers used in (H).
- H Integration of the miniAID-HA<sub>3</sub> at the N-terminus of the *TgCRMPa* locus in the Tir-1 parental line was tested by PCR. The fragments corresponding to the HA<sub>3</sub> (5') and the HA<sub>3</sub>-miniAID (3') integration were detected exclusively in the putative iKD line; the wild-type fragment (wt) was amplified in the untagged line (~ 1,556 bp) and iKD line (~ 1,026 bp, tag minus introns). L: DNA ladder (bp). Primers are listed in Table EV1.
- I Immunofluorescence images of untagged and N-terminal and C-terminal miniAID-HA<sub>3</sub>-TgCRMPa (iKD) intracellular tachyzoites. Parasites treated 24 h with IAA, as well as untreated (-IAA), were stained with anti-HA Abs. The nuclei (DNA) are stained with Hoechst. Shown are single focal planes.
- J Representative images of lytic plaques formation in HFF monolayers infected with IAA-treated and untreated Tir-1 control and N-terminal and C-terminal miniAID-HA<sub>3</sub>-TgCRMPa (iKD) lines.
- K Immunofluorescence images of extracellular N-terminal and C-terminal miniAID-HA<sub>3</sub>-TgCRMPa tachyzoites. Parasites were incubated with ionophore A23187 to induce artificial conoid extrusion, and stained with anti-HA Abs. TgCRMPa localization at the tip of the extruded conoid (arrow) is visible only in the C-terminally miniAID-HA<sub>3</sub>-tagged TgCRMPa (lower panel). DNA is labeled by Hoechst. Single focal planes are shown. DIC: differential interference contrast.
- L Quantification of the dot pattern for HA<sub>3</sub>-miniAID-TgCRMPa (N-term) and TgCRMPa-miniAID-HA<sub>3</sub> (C-term) tachyzoites. TgCRMPa accumulation at the apical tip of extracellular parasites was measured upon incubation with ionophore A23187 to induce artificial conoid extrusion. Parasites were fixed and stained with anti-HA Abs and with (+ triton) or without (- triton) permeabilization. CRMPa signal at the apical dot is absent in non-permeabilized parasites, and it is robustly detected only in permeabilized parasites expressing C-terminally miniAID-HA<sub>3</sub>-tagged TgCRMPa. No significant apical signal was detected for the control (untagged) or the N-terminally miniAID-HA<sub>3</sub>-tagged TgCRMPa lines. Numbers are expressed as a percentage of parasites showing (dot) or lacking (no dot) the tip accumulation of TgCRMPa. The number of parasites (*n*) analyzed for each line is reported on the column tops.
- M Marker-free strategy used for generating HA<sub>3</sub>-TgCRMPa strain. The integration of the tag at the N-terminus between residues Thr600 and Asn601 (after the MAR/Kringle domain; Fig 5H) into the *TgCRMPa* locus is ensured by 200-bp-long homology regions (HR), flanking the tag in the synthetic gBlock upon CRISPR-Cas9 activity (scissors). The arrows indicate the binding sites of the primers used in (N).
- N Integration of the triple HA at the N-terminus of the *TgCRMPa* locus was tested by PCR. The fragments corresponding to the 5' and 3' integration were detected exclusively in the putative HA<sub>3</sub>-tagged line; and the wild-type fragment (wt) was amplified in the untagged line (~ 1,424 bp) and tagged line (~ 1,550 bp, containing linker+HA<sub>3</sub>). L: DNA ladder (bp). Primers are listed in Table EV1.
- O Immunofluorescence image of intracellular HA<sub>3</sub>-TgCRMPa tachyzoites. Parasites were stained with anti-HA Abs and DNA is labeled by Hoechst. Single focal planes are shown. DIC, differential interference contrast.

Source data are available online for this figure.

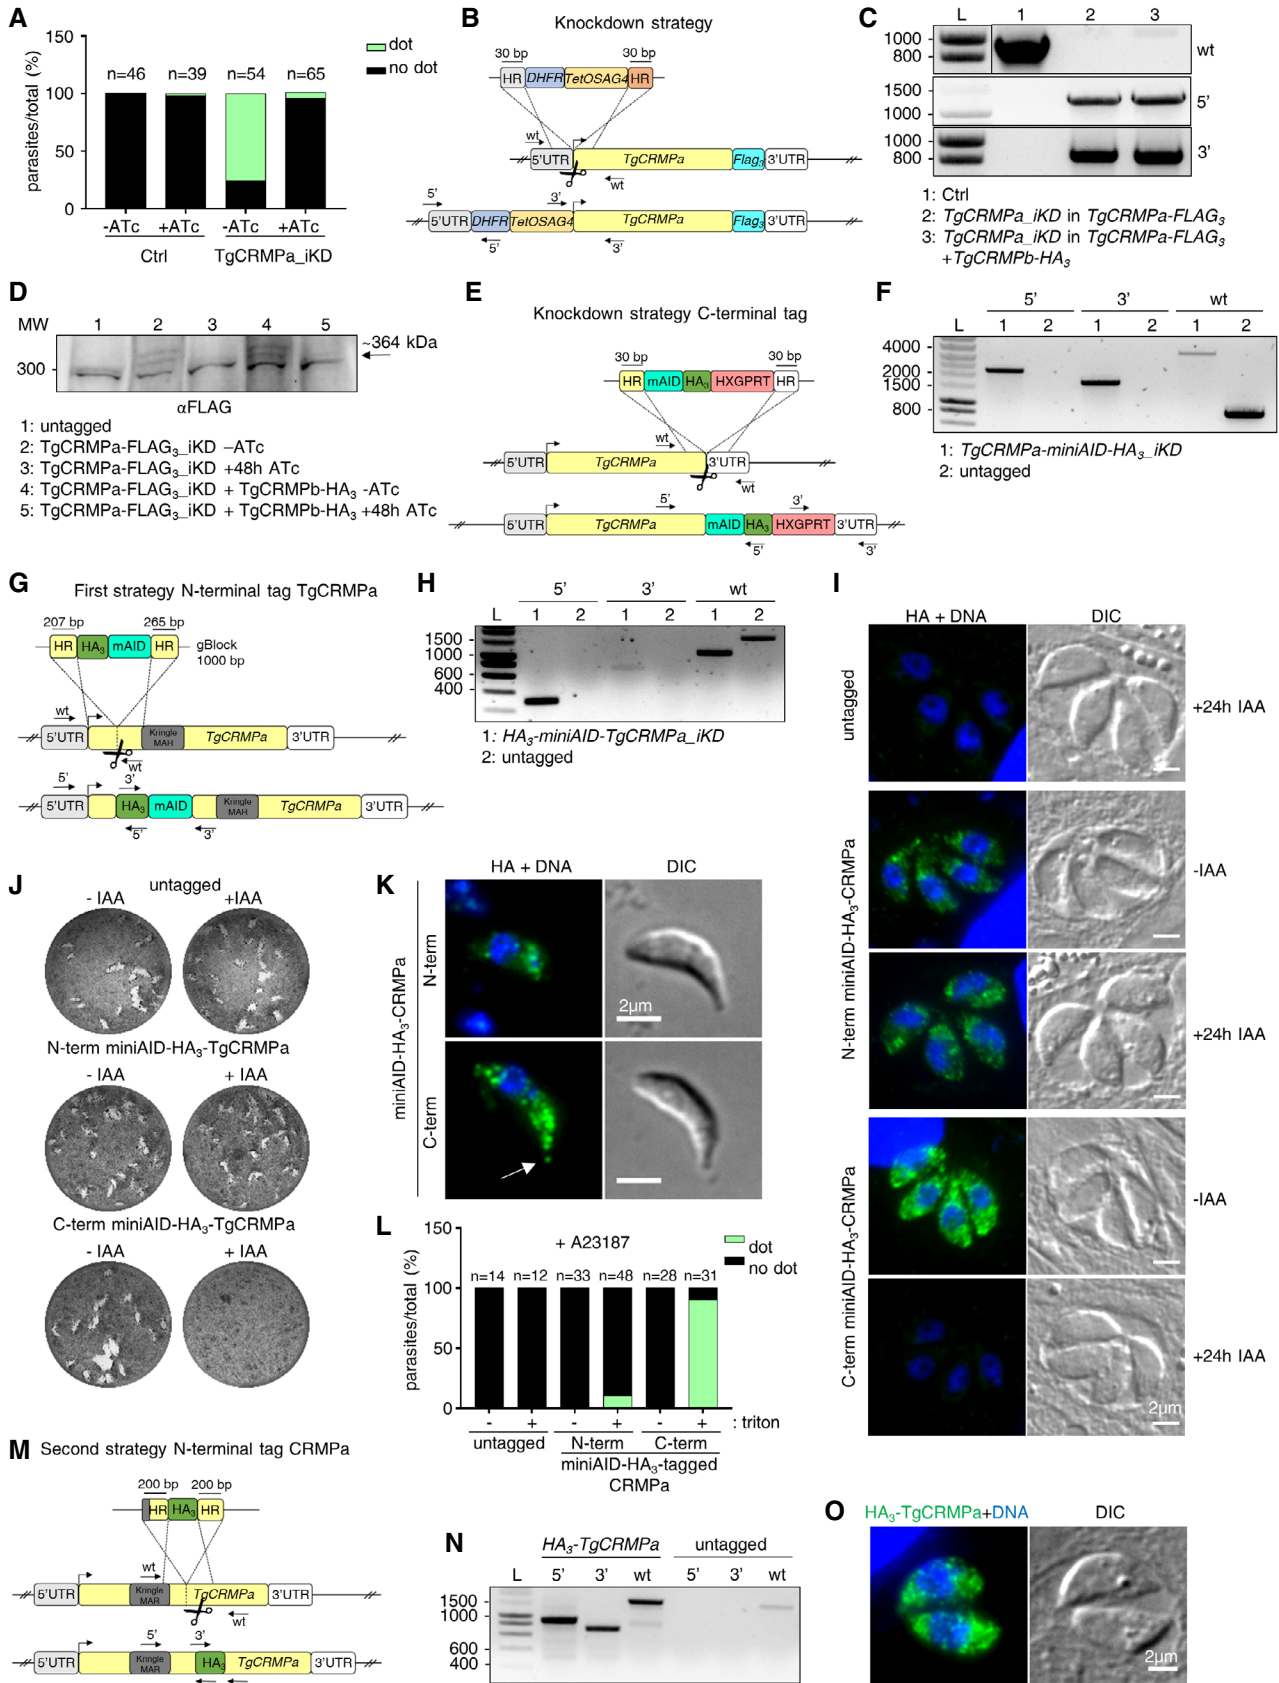

Figure EV4.

**Figure EV5. CRMPs and Nd6 co-localize at the exocytic site in extracellular *Toxoplasma gondii* (related to Fig 6).**

- A Strategy for TY<sub>2</sub> tagging of TgNd6 in TgCRMPa-HA<sub>3</sub> and TgCRMPb-HA<sub>3</sub> lines. To generate a C-terminal TY<sub>2</sub>-fusion of TgNd6, a DNA fragment was amplified from a donor vector containing the TY<sub>2</sub> tag and the drug resistance cassette (DHFR). Primers to amplify the DNA fragment were designed to contain 30-bp-long stretches (HR) homologous to TgND6 regions flanking the insertion site for the epitope tag. Upon CRISPR-cas9 cut (scissors), the PCR-amplified DNA fragment efficiently recombines into the targeted endogenous locus. The arrows indicate the binding sites of the primers used in (B).
- B Integration of the TY<sub>2</sub> tag and DHFR cassette at the C-terminus of *TgND6* locus was tested by PCR. Genomic DNAs from an untagged line and clonal populations for TgNd6-TY<sub>2</sub> + TgCRMPa-HA<sub>3</sub> and TgNd6-TY<sub>2</sub> + TgCRMPb-HA<sub>3</sub> lines were amplified with primers binding to the 3' C-terminus and 3'UTR of *TgNd6*, and also in pairwise combination with primers binding the TY<sub>2</sub> and DHFR sequences, respectively. The fragments corresponding to the TY<sub>2</sub> tag (5') and the resistance cassette (3') were correctly amplified in the putative tagged lines, indicating that they were efficiently integrated at the *TgNd6* locus. As expected, the wild-type fragment for *TgNd6* (wt) was detected only in the untagged line. L: DNA ladder (bp). Primers are listed in Table EV1.
- C Whole-cell lysates from untagged and TgNd6-TY<sub>2</sub> + TgCRMPa-HA<sub>3</sub> and TgNd6-TY<sub>2</sub> + TgCRMPb-HA<sub>3</sub> parasites were immunoblotted with anti-TY Abs to detect tagged Nd6. A band around the expected size (~ 195 kDa) for TgNd6-TY<sub>2</sub> was observed exclusively for the tagged lines. MW: molecular weight standards.
- D Immunofluorescence images of intracellular (upper and middle panels) and extracellular (lower panel) tachyzoites from untagged and TgCRMPb-HA<sub>3</sub> + TgNd6-TY<sub>2</sub> lines. Extracellular parasites were incubated with host cell monolayers for 2 min prior to fixation. Parasites were stained with anti-HA and anti-TY Abs to label CRMPb and Nd6, respectively. Nd6, but not CRMPb, accumulates at the tachyzoite apex in intracellular parasites (arrowheads), while both proteins localize at the tip of the extruded conoid in extracellular parasites (arrows). DNA is labeled by Hoechst. Single focal planes are shown. DIC, differential interference contrast.
- E Integration of the HA<sub>3</sub> tag and CAT cassette at the C-terminus of *TgCRMPa* and *TgCRMPb* genes in TgNd9\_iKD line was tested by PCR as in Fig EV2A and B. The fragments corresponding to the HA<sub>3</sub> tag (5') and the resistance cassette (3') were correctly amplified in the putative tagged lines, indicating that they were efficiently integrated at the TgCRMPs loci. As expected, the wild-type fragment of each gene (wt) was detected only in the untagged line. L: DNA ladder. Primers are listed in Table EV1.
- F Depletion of *TgNd9* transcripts was assessed by RT-PCR for the experiment shown in Fig 6D. Total RNAs from TgCRMPa-HA<sub>3</sub> and TgCRMPb-HA<sub>3</sub> expressed in TgNd9\_iKD (minus epitope tag) parasites and parental line were subjected to reverse transcription and PCR amplified with primers binding *TgNd9* transcripts. *TgGAPDH* was used as housekeeping gene. *TgNd9* transcripts strongly decreased upon 72 h ATc treatment (+ATc). L: DNA ladder (L). Primers are listed in Table EV1.
- G Depletion of TgNd9 proteins in the lines used for the experiment in Fig 6D was also assessed by quantifying the defect in the invasion of ATc-treated TgNd9\_iKD parasites expressing TgCRMPa-HA<sub>3</sub> and TgCRMPb-HA<sub>3</sub> versus untreated. The values are reported as percentages of the number of invading/intracellular and extracellular parasites over the total number of parasites. The number of fields (f) analyzed for each line is reported on the column tops.
- H Immunofluorescence images of intracellular and extracellular tachyzoites from TgCRMPb-HA<sub>3</sub> + TgCRMPa-TY<sub>2</sub> line. Extracellular parasites were incubated with host cell monolayers for 2 min prior to fixation. Parasites were stained with anti-HA and anti-TY Abs to label CRMPb and CRMPa, respectively. Both proteins localize at the tip of the extruded conoid in extracellular parasites (arrows) and show partial overlap within the parasite cytosol. An untagged line was used to estimate the background noise. DNA is labeled by Hoechst. Single focal planes are shown. DIC, differential interference contrast.
- I Integration of the TY<sub>2</sub> tag and DHFR cassette at the C-terminus of the *TgCRMPa* locus in TgCRMPb-HA<sub>3</sub> line was tested by PCR as described in (B) for TgNd6-TY<sub>2</sub>. The fragments corresponding to the TY<sub>2</sub> tag (5') and the resistance cassette (3') were correctly amplified in the putative tagged line, indicating that they were efficiently integrated at the *TgCRMPa* locus. As expected, the wild-type fragment for *TgCRMPa* (wt) was detected only in the untagged line. L: DNA ladder (bp). Primers are listed in Table EV1.
- J Whole-cell lysates from TgCRMPb-HA<sub>3</sub> and TgCRMPb-HA<sub>3</sub> + TgCRMPa-TY<sub>2</sub> parasites were immunoblotted with anti-TY Abs to detect tagged CRMPa. A band around the expected size (~ 348 kDa) for TgCRMPa-TY<sub>2</sub> together with the processed form were observed exclusively for the tagged line. MW: molecular weight standards.

Source data are available online for this figure.



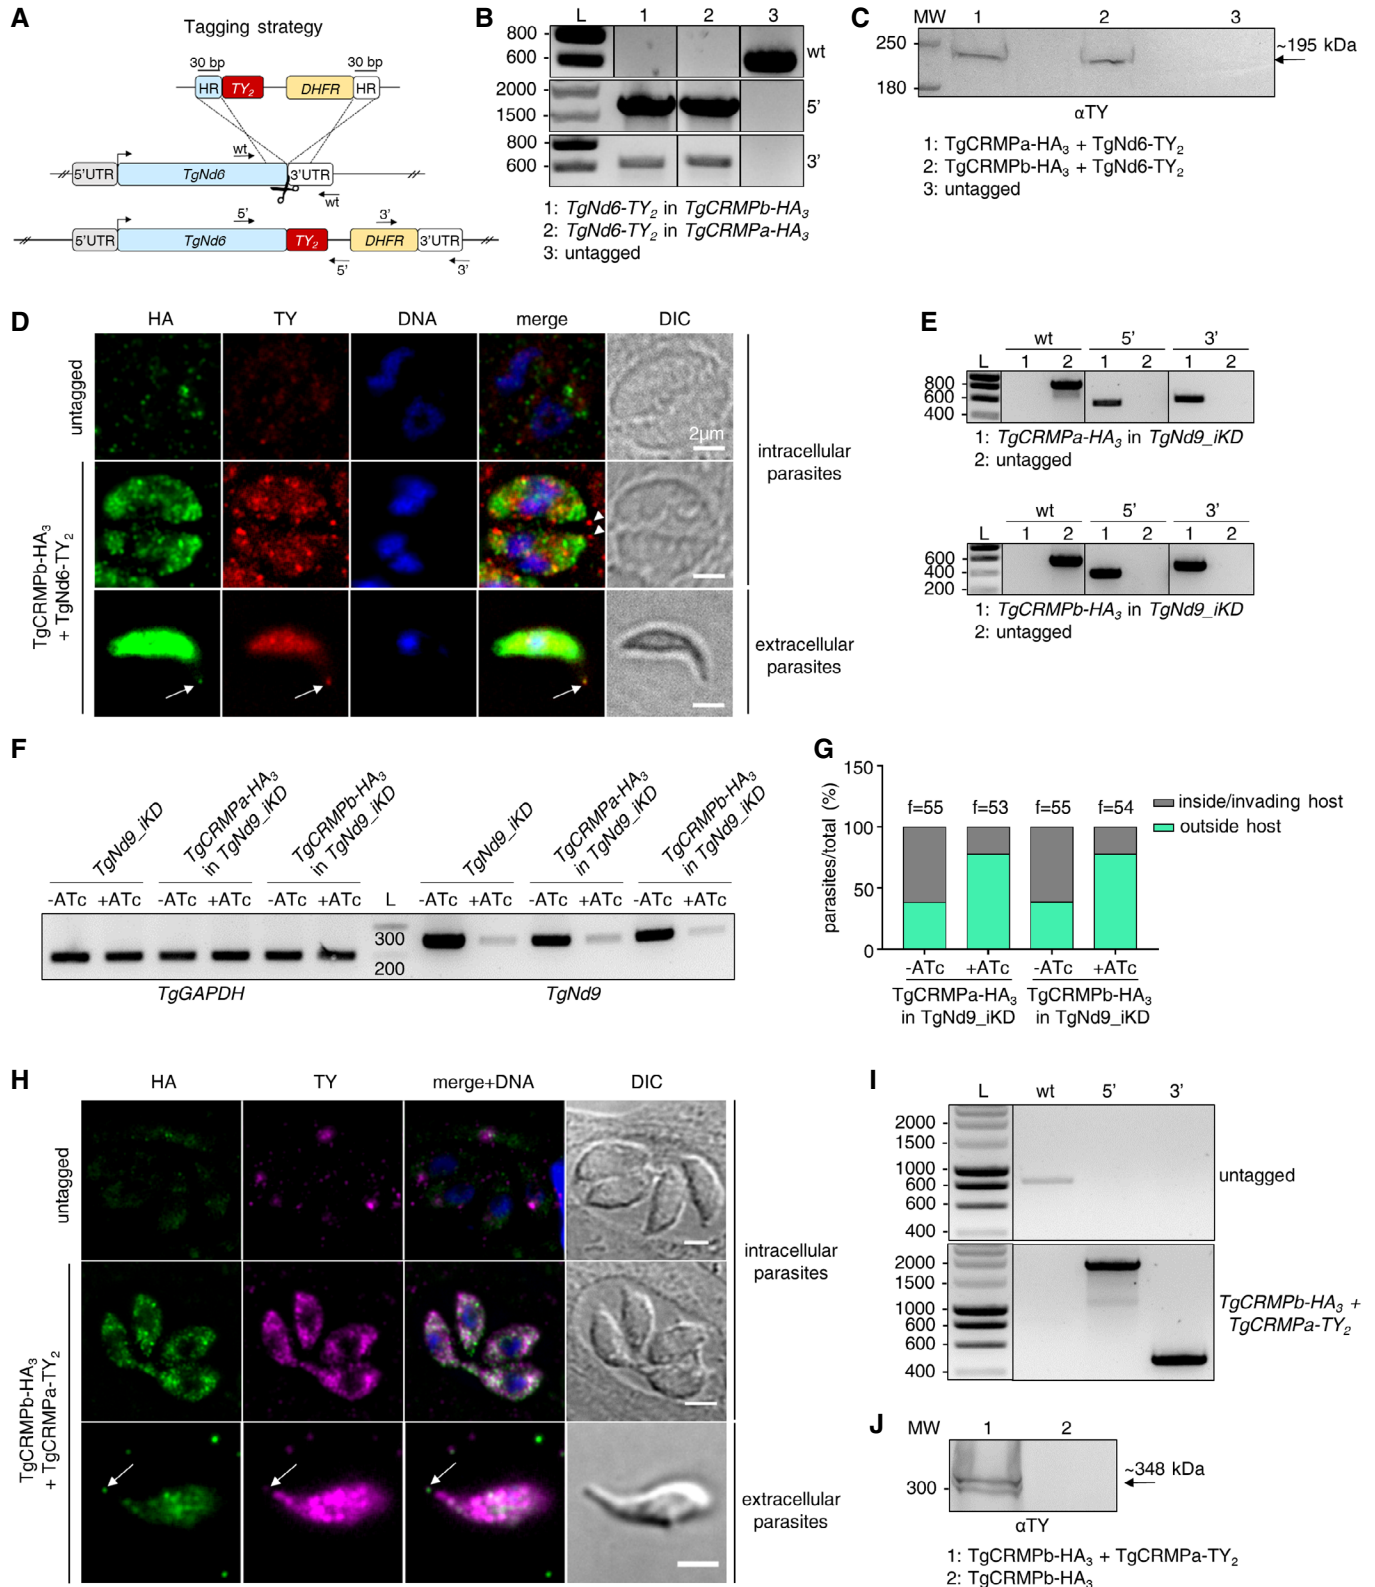

Figure EV5.

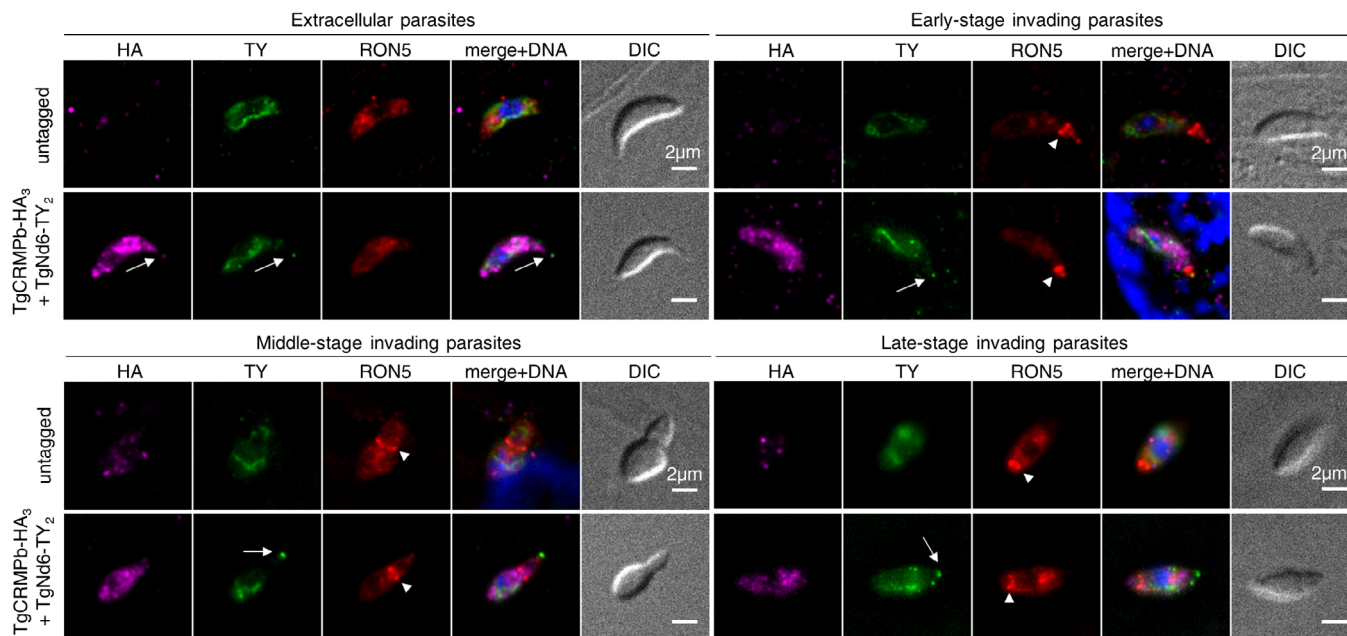

**Figure EV6. CRMP and Nd complexes show different dynamics at the exocytic site in *Toxoplasma gondii* (related to Fig 6).**

Immunofluorescence images of extracellular parasites and parasites in early, middle, and late stages of host cell invasion. Parasites co-expressing TgCRMPb-HA<sub>3</sub> with TgNd6-TY<sub>2</sub> were incubated with host cell monolayers and stained as in Fig 6E. Untagged parasites were treated in parallel. In contrast with TgNd6 (arrow), the apical accumulation of TgCRMPb observed in extracellular parasites disappears upon entering the host and remains undetected for the entire process. The moving junction is indicated by the arrowhead. Non-specific anti-TY labeling of mitochondria was detected for both untagged and tagged lines. DIC, differential interference contrast. Single focal planes are shown.
