# Supplementary material for: An apical membrane complex for triggering rhoptry exocytosis and invasion in Toxoplasma
Source: PubMed Central journal article supplement (PMC9670195; doi:10.15252/embj.2022111158), 2022-10-17

**Related to figure 3**

**Figure 3B, upper panels**

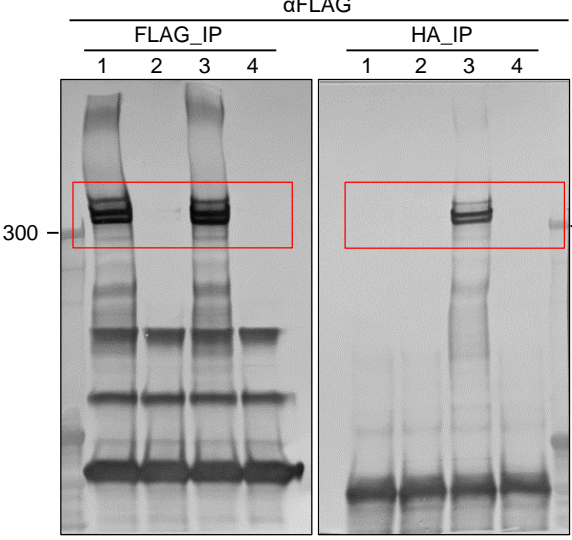

**Figure 3B, middle and lower panels**

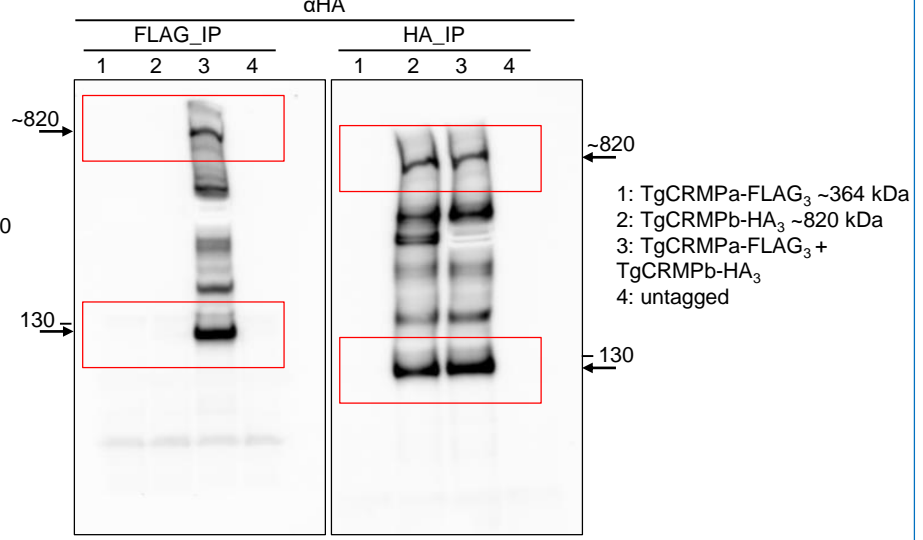

**Figure 3G, upper and lower panels**

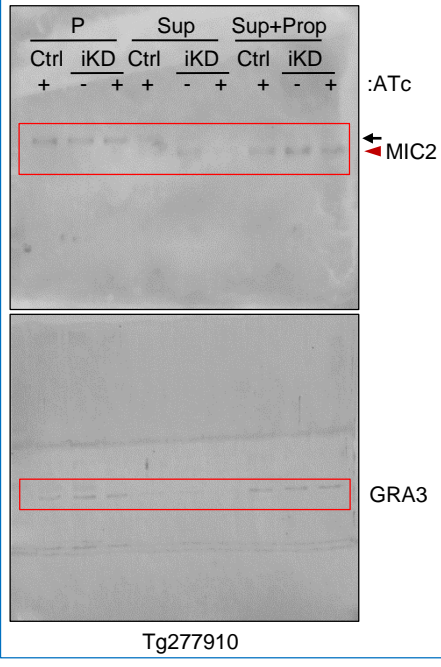

Supplement: EMBJ-41-e111158-s012.pdf [file EMBJ-41-e111158-s012.pdf]
